# Supplementary material for: House dust mite extract forms a der p 2 corona on multi-walled carbon nanotubes: implications for allergic airway disease
Source: Royal Society of Chemistry journal article supplement (doi:10.1039/d3en00666b), 2023-12-15
Supplement: d3en00666b1.pdf [file d3en00666b1.pdf]

## Electronic Supplementary Material

House Dust Mite Extract Forms a Der p 2 Corona on Multi-Walled Carbon Nanotubes:  
Implications for Allergic Airway Disease

Judith Dominguez,<sup>a</sup> Samantha K. Holmes,<sup>a</sup> Ryan D. Bartone,<sup>b</sup> Logan J. Tisch,<sup>b</sup> Robert  
M. Tighe,<sup>c</sup> James C. Bonner,<sup>b</sup> Christine K. Payne<sup>a,\*</sup>

\*christine.payne@duke.edu

a. Thomas Lord Department of Mechanical Engineering and Materials Science, Duke  
University, Durham, North Carolina, USA 27708

b. Toxicology Program, Department of Biological Sciences, North Carolina State  
University, Raleigh, North Carolina, USA 27695

c. Department of Medicine, Duke University School of Medicine, Durham, North  
Carolina, USA 27710

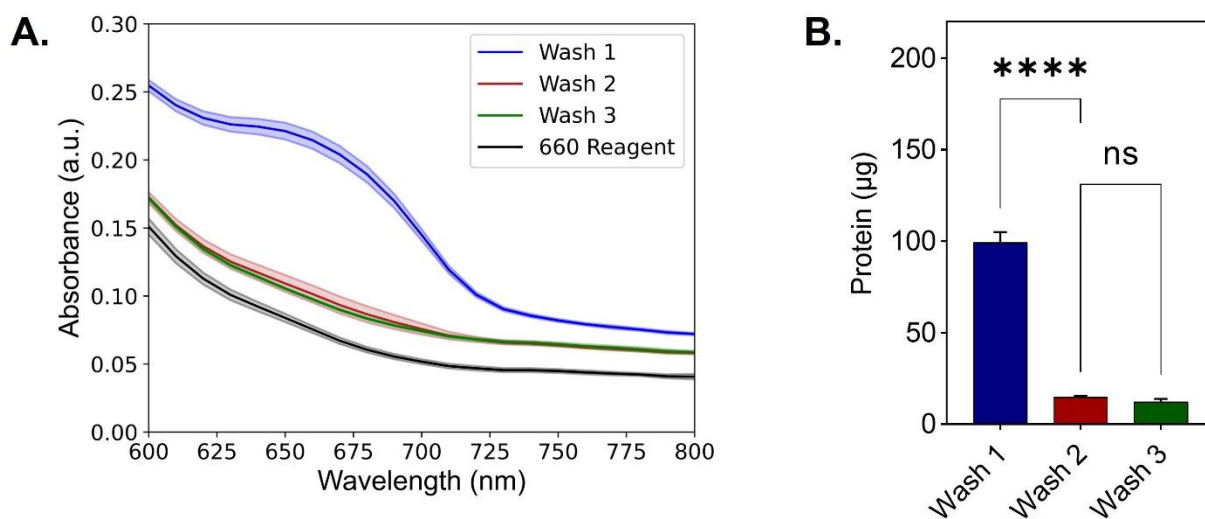

**Fig. S1** Removal of unbound HDM, referred to as washing, consisted of centrifugation (14,000 rpm, 15 minutes), removal of supernatant, and resuspension in PBS. A. Protein concentration of the supernatant was measured with a colorimetric assay (660 nm protein assay). Solid line shows the average absorbance spectrum. Shading shows standard deviation. (n=3 distinct samples). B. The majority of the unbound HDM is removed in the first wash. Three wash steps are used to ensure all unbound protein is removed. The background signal from the 660 nm reagent was subtracted from each sample prior to calculating protein concentrations. Significance was calculated using an ANOVA with a post-hoc Tukey test. \*p < 0.001, ns = not significant.

**Table S1.** Spectral counts, reported as a percent of total signal, for the excised 15 kDa band of the HDM-MWCNT corona (Fig. 2B). Proteins with spectral counts >1% are listed.

| Protein                                 | MW (kDa) | 15 kDa (%) |
|-----------------------------------------|----------|------------|
| Der p 2 (NPC2 family)                   | 14       | 81.6       |
| Thioredoxin                             | 12       | 9.70       |
| Der p 36 (C2 domain containing protein) | 25       | 3.51       |
| Nucleoside diphosphate kinase           | 18       | 1.56       |

**Table S2.** Spectral counts, reported as a percent of total signal, for the excised 12 kDa band of the HDM-MWCNT corona (Fig. 2B). Proteins with spectral counts >1% are listed.

| Protein                                | MW (kDa) | 12 kDa (%) |
|----------------------------------------|----------|------------|
| Der p 30 (ferritin)                    | 12       | 71.0       |
| Fructose-bisphosphate aldolase         | 39       | 9.84       |
| Der p 11 (paramyosin)                  | 102      | 5.22       |
| Uncharacterized protein LOC113797715   | 191      | 4.71       |
| Glutathione peroxidase                 | 25       | 1.88       |
| Myosin heavy chain                     | 112      | 1.73       |
| Inosine-5'-monophosphate dehydrogenase | 56       | 1.51       |

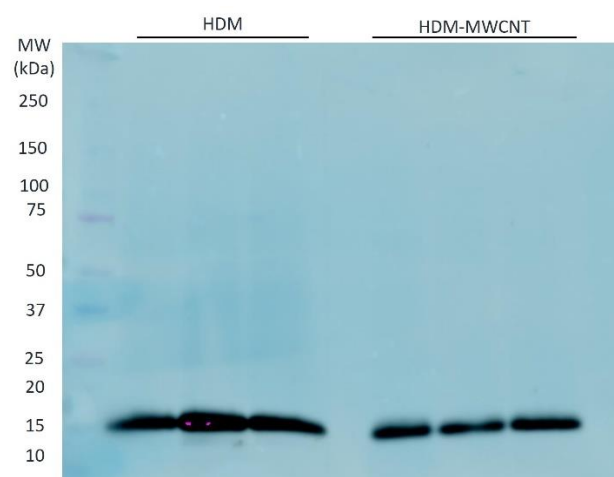

**Fig. S2** Western blotting using an antibody against der p 2 confirms the band visible at ~15 kDa is der p 2 (14 kDa).

**Table S3.** Normalized abundance (% of total protein) of the top-10 proteins identified in HDM and the HDM corona formed on MWCNTs (HDM-MWCNT). Proteins present in a sample, but not in the top-10, are shown in italics. Proteins with normalized abundance < 0.1% are not shown. The most abundant protein in each sample is bolded. Mean and standard deviation are reported (n=3). A different lot (#390991) of HDM was used in comparison to the data in the main text (Table 2). For both lots, der p 2 is the most abundant protein in corona.

| Protein                              | MW (kDa) | HDM (%)            | HDM-MWCNT (%)      |
|--------------------------------------|----------|--------------------|--------------------|
| <b>Der p 2 (NPC2 family)</b>         | 14       | <b>24.5 ± 5.20</b> | <b>51.6 ± 15.6</b> |
| Der p 1 (cysteine protease)          | 34       | 23.6 ± 0.98        | 4.72 ± 3.69        |
| Der p 30 (ferritin)                  | 12       | 8.50 ± 2.62        | 4.22 ± 1.17        |
| Uncharacterized protein LOC113799616 | 25       | 7.28 ± 2.31        | 10.7 ± 9.76        |
| Uncharacterized protein LOC113797715 | 191      | 7.04 ± 2.13        | <i>0.71 ± 0.29</i> |
| Uncharacterized protein LOC113790193 | 27       | 3.48 ± 1.80        | 3.12 ± 1.67        |
| Fatty acid-binding protein-like      | 15       | 2.19 ± 0.39        | 2.76 ± 2.48        |
| Nucleoside diphosphate kinase        | 18       | 1.91 ± 0.82        | 3.92 ± 1.78        |
| Uncharacterized protein LOC113796509 | 77       | 1.85 ± 1.80        | -                  |
| Der p 10 (tropomyosin)               | 33       | 1.28 ± 1.07        | <i>0.74 ± 0.85</i> |
| Der f 22 (Group 2-like)              | 18       | <i>0.47 ± 0.77</i> | 3.35 ± 3.32        |
| Der p 11 (paramyosin)                | 102      | 0.25 ± 0.056       | 1.96 ± 1.57        |
| Lysosomal aspartic protease-like     | 45       | <i>0.13 ± 0.19</i> | 1.09 ± 1.84        |
